# Supplementary material for: mUbiSiDa: A Comprehensive Database for Protein Ubiquitination Sites in Mammals
Source: PLoS One. 2014 Jan 17;9(1):e85744. doi: 10.1371/journal.pone.0085744 (PMC3894998; doi:10.1371/journal.pone.0085744)
Supplement: File S1 — Gene Ontology classification and pathway enrichment analysis results for human and mouse ubiquitinated proteins. (XLSX) [file pone.0085744.s001.xlsx]

## Sheet: Gene Ontology Classification
Species	Class	Accession	Term	Proportion
Human	Cellular Component	(GO:0043234)	protein complex	0.114
Human	Cellular Component	(GO:0030529)	ribonucleoprotein complex	0.1
Human	Cellular Component	(GO:0005576)	extracellular region	0.088
Human	Cellular Component	(GO:0005886)	plasma membrane	0.078
Human	Cellular Component	(GO:0005622)	intracellular	0.619
Human	Molecular Function	(GO:0005216)	ion channel activity	0.013
Human	Molecular Function	(GO:0005215)	transporter activity	0.046
Human	Molecular Function	(GO:0045182)	translation regulator activity	0.011
Human	Molecular Function	(GO:0030528)	transcription regulator activity	0.08
Human	Molecular Function	(GO:0030234)	enzyme regulator activity	0.057
Human	Molecular Function	(GO:0003824)	catalytic activity	0.317
Human	Molecular Function	(GO:0003774)	motor activity	0.007
Human	Molecular Function	(GO:0004872)	receptor activity	0.043
Human	Molecular Function	(GO:0016209)	antioxidant activity	0.002
Human	Molecular Function	(GO:0005198)	structural molecule activity	0.084
Human	Molecular Function	(GO:0005488)	binding	0.339
Human	Biological Process	(GO:0007154)	cell communication	0.091
Human	Biological Process	(GO:0009987)	cellular process	0.164
Human	Biological Process	(GO:0051179)	localization	0.004
Human	Biological Process	(GO:0006810)	transport	0.086
Human	Biological Process	(GO:0016043)	cellular component organization	0.045
Human	Biological Process	(GO:0006915)	apoptosis	0.03
Human	Biological Process	(GO:0003008)	system process	0.04
Human	Biological Process	(GO:0000003)	reproduction	0.017
Human	Biological Process	(GO:0050896)	response to stimulus	0.033
Human	Biological Process	(GO:0050789)	regulation of biological process	0
Human	Biological Process	(GO:0042592)	homeostatic process	0.003
Human	Biological Process	(GO:0032502)	developmental process	0.067
Human	Biological Process	(GO:0006091)	generation of precursor metabolites and energy	0.012
Human	Biological Process	(GO:0008152)	metabolic process	0.272
Human	Biological Process	(GO:0007049)	cell cycle	0.063
Human	Biological Process	(GO:0002376)	immune system process	0.049
Human	Biological Process	(GO:0007155)	cell adhesion	0.022
Mouse	Cellular Component	(GO:0043234)	protein complex	0.105
Mouse	Cellular Component	(GO:0030529)	ribonucleoprotein complex	0.092
Mouse	Cellular Component	(GO:0005576)	extracellular region	0.088
Mouse	Cellular Component	(GO:0005886)	plasma membrane	0.108
Mouse	Cellular Component	(GO:0005622)	intracellular	0.606
Mouse	Molecular Function	(GO:0005216)	ion channel activity	0.023
Mouse	Molecular Function	(GO:0005215)	transporter activity	0.076
Mouse	Molecular Function	(GO:0045182)	translation regulator activity	0.011
Mouse	Molecular Function	(GO:0030528)	transcription regulator activity	0.05
Mouse	Molecular Function	(GO:0030234)	enzyme regulator activity	0.062
Mouse	Molecular Function	(GO:0003824)	catalytic activity	0.343
Mouse	Molecular Function	(GO:0003774)	motor activity	0.009
Mouse	Molecular Function	(GO:0004872)	receptor activity	0.056
Mouse	Molecular Function	(GO:0016209)	antioxidant activity	0.002
Mouse	Molecular Function	(GO:0005198)	structural molecule activity	0.085
Mouse	Molecular Function	(GO:0005488)	binding	0.283
Mouse	Biological Process	(GO:0007154)	cell communication	0.104
Mouse	Biological Process	(GO:0009987)	cellular process	0.157
Mouse	Biological Process	(GO:0051179)	localization	0.005
Mouse	Biological Process	(GO:0006810)	transport	0.102
Mouse	Biological Process	(GO:0016043)	cellular component organization	0.038
Mouse	Biological Process	(GO:0006915)	apoptosis	0.026
Mouse	Biological Process	(GO:0003008)	system process	0.06
Mouse	Biological Process	(GO:0000003)	reproduction	0.015
Mouse	Biological Process	(GO:0050896)	response to stimulus	0.034
Mouse	Biological Process	(GO:0050789)	regulation of biological process	0.001
Mouse	Biological Process	(GO:0042592)	homeostatic process	0.003
Mouse	Biological Process	(GO:0032502)	developmental process	0.065
Mouse	Biological Process	(GO:0006091)	generation of precursor metabolites and energy	0.018
Mouse	Biological Process	(GO:0008152)	metabolic process	0.251
Mouse	Biological Process	(GO:0007049)	cell cycle	0.043
Mouse	Biological Process	(GO:0002376)	immune system process	0.052
Mouse	Biological Process	(GO:0007155)	cell adhesion	0.025

## Sheet: Enriched pathway
Species	Category	ID	Name	Proportion	P-value
Human	Pathway	REACTOME_GENE_EXPRESSION	Genes involved in Gene Expression	0.039598	5.324e-47
Human	Pathway	REACTOME_CELL_CYCLE_MITOTIC	Genes involved in Cell Cycle, Mitotic	0.0300315	3.474e-42
Human	Pathway	REACTOME_INFLUENZA_LIFE_CYCLE	Genes involved in Influenza Life Cycle	0.015379	5.172e-33
Human	Pathway	REACTOME_TRANSLATION	Genes involved in Translation	0.0136837	6.012e-31
Human	Pathway	REACTOME_HIV_INFECTION	Genes involved in HIV Infection	0.0186486	5.255e-29
Human	Pathway	REACTOME_GTP_HYDROLYSIS_AND_JOINING_OF_THE_60S_RIBOSOMAL_SUBUNIT	Genes involved in GTP hydrolysis and joining of the 60S ribosomal subunit	0.0121095	1.922e-27
Human	Pathway	REACTOME_METABOLISM_OF_PROTEINS	Genes involved in Metabolism of proteins	0.0207072	1.209e-26
Human	Pathway	WP2004	Lymphocyte TarBase	0.0347542	2.936e-26
Human	Pathway	REACTOME_PROCESSING_OF_CAPPED_INTRON_CONTAINING_PRE_MRNA	Genes involved in Processing of Capped Intron-Containing Pre-mRNA	0.0146525	4.704e-26
Human	Pathway	REACTOME_HOST_INTERACTIONS_OF_HIV_FACTORS	Genes involved in Host Interactions of HIV factors	0.0130782	2.573e-25
mouse	Pathway	REACTOME_METABOLISM_OF_AMINO_ACIDS	Genes involved in Metabolism of amino acids	0.025345	2.212e-16
mouse	Pathway	REACTOME_METABOLISM_OF_LIPIDS_AND_LIPOPROTEINS	Genes involved in Metabolism of lipids and lipoproteins	0.0308657	1.609e-13
mouse	Pathway	REACTOME_INTEGRATION_OF_ENERGY_METABOLISM	Genes involved in Integration of energy metabolism	0.0293601	1.273e-10
mouse	Pathway	REACTOME_REGULATION_OF_INSULIN_SECRETION	Genes involved in Regulation of Insulin Secretion	0.0271016	1.256e-09
mouse	Pathway	REACTOME_DIABETES_PATHWAYS	Genes involved in Diabetes pathways	0.0419072	1.666e-08
mouse	Pathway	REACTOME_GENE_EXPRESSION	Genes involved in Gene Expression	0.0454203	2.057e-08
mouse	Pathway	WP534	Glycolysis and Gluconeogenesis	0.00878294	7.08e-08
mouse	Pathway	REACTOME_GLUCOSE_REGULATION_OF_INSULIN_SECRETION	Genes involved in Glucose Regulation of Insulin Secretion	0.0208281	1.681e-07
mouse	Pathway	REACTOME_METABOLISM_OF_CARBOHYDRATES	Genes involved in Metabolism of carbohydrates	0.0163112	7.371e-07
mouse	Pathway	REACTOME_TRANSMEMBRANE_TRANSPORT_OF_SMALL_MOLECULES	Genes involved in Transmembrane transport of small molecules	0.025596	1.339e-06
